# Supplementary material
Source: PubMed Central journal article supplement (PMC1458670)
Supplement: pnas_0510996103_6.pdf [file pnas_0510996103_6.pdf]

**Table 1. Antibodies used for chromatin immunoprecipitation (ChIP)**

| Protein | Antibody | Manufacturer                              | References   |        |
|---------|----------|-------------------------------------------|--------------|--------|
|         |          |                                           | Western blot | ChIP   |
| p65     | sc-372   | Santa Cruz<br>Biotechnology               | (1, 2)       | (3-5)  |
| p50     | sc-1190  | Santa Cruz<br>Biotechnology               | (6)          | (7)    |
| RelB    | sc-226   | Santa Cruz<br>Biotechnology               | (8)          | (5)    |
| c-Rel   | sc-71    | Santa Cruz<br>Biotechnology               | (8)          | (5, 9) |
| p52     | 06-413   | Upstate Biotechnology,<br>Lake Placid, NY | (10)         |        |
| E2F4    | sc-1082  | Santa Cruz<br>Biotechnology               | (11)         | (12)   |
| Pol II  | 8WG16    |                                           | (13)         | (14)   |

The fact that the p65 dataset has no targets in unstimulated cells confirms the lack of background enrichment from the Dynal magnetic beads. The number of p50 targets in unstimulated cells is higher than for the other subunits. We were concerned that this might be due to the antibody used. Therefore, we tested another antibody raised against the N-terminus of the protein (sc-1191). In test experiments, 90% of enriched gene promoters were shared between the two p50 antibodies (data not shown).

- Rodriguez, M. S., Thompson, J., Hay, R. T. & Dargemont, C. (1999) *J. Biol. Chem.* **274**, 9108-9115.
- Huang, T. T., Kudo, N., Yoshida, M. & Miyamoto, S. (2000) *Proc. Natl. Acad. Sci. USA* **97**, 1014-1019.
- Nissen, R. M. & Yamamoto, K. R. (2000) *Genes Dev.* **14**, 2314-2329.
- Martone, R., Euskirchen, G., Bertone, P., Hartman, S., Royce, T. E., Luscombe, N. M., Rinn, J. L., Nelson, F. K., Miller, P., Gerstein, M., *et al.* (2003) *Proc. Natl. Acad. Sci. USA* **100**, 12247-12252.
- Saccani, S., Pantano, S. & Natoli, G. (2003) *Mol. Cell* **11**, 1563-1574.
- Yamazaki, T. & Kurosaki, T. (2003) *Nat. Immunol* **4**, 780-786.
- Baek, S. H., Ohgi, K. A., Rose, D. W., Koo, E. H., Glass, C. K. & Rosenfeld, M. G. (2002) *Cell* **110**, 55-67.
- Wang, W., Tam, W. F., Hughes, C. C., Rath, S. & Sen, R. (1997) *Immunity* **6**, 165-174.
- Liu, J. & Beller, D. I. (2003) *J. Immunol.* **170**, 4489-4496.
- Senftleben, U., Cao, Y., Xiao, G., Gretchen, F. R., Krahn, G., Bonizzi, G., Chen, Y., Hu, Y., Fong, A., Sun, S. C. & Karin, M. (2001) *Science* **293**, 1495-1499.
- Takahashi, Y., Rayman, J. B. & Dynlacht, B. D. (2000) *Genes Dev.* **14**, 804-816.
- Ren, B., Cam, H., Takahashi, Y., Volkert, T., Terragni, J., Young, R. A. & Dynlacht, B. D. (2002) *Genes Dev.* **16**, 245-256.
- Hirakata, M., Okano, Y., Pati, U., Suwa, A., Medsger, T. A., Jr., Hardin, J. A. & Craft, J. (1993) *J. Clin. Invest.* **91**, 2665-2672.
- Odom, D. T., Zizlsperger, N., Gordon, D. B., Bell, G. W., Rinaldi, N. J., Murray, H. L., Volkert, T. L., Schreiber, J., Rolfe, P. A., Gifford, D. K., *et al.* (2004) *Science* **303**, 1378-1381.
