# Supplementary material
Source: PubMed Central journal article supplement (PMC1458670)
Supplement: pnas_0510996103_7.pdf [file pnas_0510996103_7.pdf]

**Table 2. Gene ontology (GO) categories enriched in the set of genes bound by NF- $\kappa$ B**

| GO system          | GO category                                            | Number of bound genes | Total number of genes in category | P value |
|--------------------|--------------------------------------------------------|-----------------------|-----------------------------------|---------|
| Biological process | Response to biotic stimulus                            | 44                    | 516                               | 6.3E-07 |
| Biological process | Immune response                                        | 38                    | 425                               | 1.3E-06 |
| Biological process | Defense response                                       | 39                    | 475                               | 7.8E-06 |
| Biological process | Response to pest/pathogen/parasite                     | 26                    | 276                               | 3E-05   |
| Molecular function | Cytokine activity                                      | 15                    | 133                               | 0.00011 |
| Molecular function | Transcription factor activity                          | 32                    | 468                               | 0.00046 |
| Biological process | Response to stress                                     | 33                    | 465                               | 0.00068 |
| Biological process | Response to wounding                                   | 16                    | 163                               | 0.0007  |
| Molecular function | Tumor necrosis factor receptor binding                 | 4                     | 12                                | 0.00072 |
| Biological process | Response to external stimulus                          | 49                    | 793                               | 0.00083 |
| Molecular function | Transcription regulator activity                       | 38                    | 635                               | 0.00172 |
| Biological process | Antigen processing, endogenous antigen via MHC class I | 3                     | 7                                 | 0.00193 |
| Biological process | Inflammatory response                                  | 12                    | 116                               | 0.00207 |
| Molecular function | Receptor binding                                       | 23                    | 332                               | 0.00255 |
| Biological process | Antigen processing                                     | 3                     | 8                                 | 0.003   |
| Biological process | Response to stimulus                                   | 53                    | 934                               | 0.00345 |
| Biological process | Transcription                                          | 50                    | 869                               | 0.00347 |
| Biological process | Innate immune response                                 | 12                    | 125                               | 0.00387 |
| Biological process | Regulation of transcription from Pol II promoter       | 13                    | 143                               | 0.0043  |
| Biological process | Response to virus                                      | 5                     | 28                                | 0.00442 |
| Molecular function | GTP binding                                            | 12                    | 139                               | 0.00517 |
| Molecular function | Chemokine receptor binding                             | 5                     | 32                                | 0.00592 |
| Molecular function | Chemokine activity                                     | 5                     | 32                                | 0.00592 |
| Molecular function | Guanyl nucleotide binding                              | 12                    | 143                               | 0.00648 |
| Molecular function | G-protein-coupled receptor binding                     | 5                     | 33                                | 0.00677 |
| Biological process | Transcription, DNA-dependent                           | 47                    | 833                               | 0.00681 |
| Biological process | Cell motility                                          | 14                    | 169                               | 0.00707 |
| Biological process | Viral life cycle                                       | 4                     | 20                                | 0.00714 |
| Molecular function | DNA binding                                            | 48                    | 930                               | 0.00858 |
| Biological process | Transcription from Pol II promoter                     | 20                    | 285                               | 0.00902 |
| Molecular function | Binding                                                | 149                   | 3,561                             | 0.0091  |

Fisher exact scores were generated using the EASEonline tool ([aaps1.niaid.nih.gov/david](http://aaps1.niaid.nih.gov/david)). A total of 5,707 genes present of the arrays were annotated by GO biological process information; 227 of these were bound by NF- $\kappa$ B.
