# Supplementary material
Source: PubMed Central journal article supplement (PMC1458670)
Supplement: pnas_0510996103_8.pdf [file pnas_0510996103_8.pdf]

**Table 3. Genes bound by NF-κB in U937 cells**

| EntrezGene symbol | Description                                           | + LPS |       |      |     | - LPS |       |      |     | Known targets |   |
|-------------------|-------------------------------------------------------|-------|-------|------|-----|-------|-------|------|-----|---------------|---|
|                   |                                                       | p65   | c-Rel | RelB | p50 | p65   | c-Rel | RelB | p50 |               |   |
| ABHD8             | hypothetical protein FLJ11743                         |       |       |      | +   |       |       |      |     |               |   |
| ACTR3             | ARP3 actin-related protein 3 homolog                  |       |       |      |     |       |       | +    | +   |               |   |
| AF093680          | similar to mouse Glt3                                 |       |       |      |     |       |       | +    | W   |               |   |
| AF15Q14           | AF15q14 protein                                       |       |       |      | +   |       |       | W    |     |               |   |
| AIM2              | absent in melanoma 2                                  |       |       |      |     |       |       | +    | +   | +             | + |
| ALAS1             | aminolevulinatase, delta-, synthase 1                 |       |       |      |     |       |       | +    | +   | +             | + |
| AP1S2             | adaptor-related protein complex 1                     |       |       |      | +   | W     |       | +    |     |               | + |
| APBB1IP           | similar to proline-rich protein 48                    |       |       |      | +   | +     | +     | +    |     |               | + |
| APG-1             | heat shock protein (hsp110 family)                    |       |       |      |     |       |       | W    |     |               | + |
| AQP9              | aquaporin 9                                           |       |       |      | +   | +     | +     | +    | +   |               |   |
| ARF3              | ADP-ribosylation factor 3                             |       |       |      | +   |       |       | +    | +   |               | + |
| ARHGAP4           | Rho GTPase activating protein 4                       |       |       |      |     |       |       | +    | W   |               |   |
| ARHGEF2           | rho/rac guanine nucleotide exchange factor            |       |       |      | +   | +     | +     | +    | +   |               | + |
| ARL1              | ADP-ribosylation factor-like 1                        |       |       |      |     |       |       | +    | +   |               | + |
| ARL6IP5           | vitamin A responsive; cytoskeleton related            |       |       |      |     |       |       | +    | +   | W             |   |
| ARTS-1            | type 1 TNFR shedding aminopeptidase regulator         |       |       |      |     |       |       | +    |     |               | + |
| ASGR2             | asialoglycoprotein receptor 2                         |       |       |      |     |       |       | +    |     |               |   |
| ASH1              | hypothetical protein ASH1                             |       |       |      | +   | +     | +     | +    |     |               |   |
| ATF6              | activating transcription factor 6                     |       |       |      |     |       |       | +    | W   |               |   |
| ATP5G1            | ATP synthase, H+ transporting                         |       |       |      |     |       |       |      |     | W             |   |
| BAT3              | HLA-B associated transcript 3                         |       |       |      | W   |       |       | +    |     |               |   |
| BAZ1B             | bromodomain adjacent to zinc finger domain, 1B        |       |       |      |     |       |       | +    |     | W             |   |
| BCL2A1            | BCL2-related protein A1                               |       |       |      | +   | +     | +     | +    |     | W             |   |
| BCL6              | B-cell CLL/lymphoma 6 (zinc finger protein 51)        |       |       |      |     |       |       | +    | W   |               |   |
| BF                | B-factor, properdin                                   |       |       |      | +   | W     |       |      |     |               | + |
| BNIP1             | BCL2/adenovirus E1B 19kD interacting protein 1        |       |       |      |     |       |       | +    | +   |               | + |
| BPI               | bactericidal/permeability-increasing protein          |       |       |      |     |       |       | +    |     |               |   |
| C10orf117         | AD24 protein                                          |       |       |      |     |       |       | +    |     |               |   |
| C11orf10          | chromosome 11 open reading frame 10                   |       |       |      |     |       |       | +    |     | W             |   |
| C14orf111         | CGI-35 protein                                        |       |       |      |     |       |       | +    |     | +             |   |
| C20orf28          | chromosome 20 open reading frame 28                   |       |       |      |     |       |       | +    |     |               |   |
| C21orf45          | chromosome 21 open reading frame 45                   |       |       |      | +   | +     |       |      |     |               |   |
| C21orf59          | chromosome 21 open reading frame 59                   |       |       |      |     |       |       | W    | +   |               | + |
| C3                | complement component 3                                |       |       |      | +   | +     | +     | +    | W   |               | + |
| C6orf109          | DKFZP566C243 protein                                  |       |       |      |     |       |       | +    |     |               | + |
| C6orf66           | HSPC125 protein                                       |       |       |      |     |       |       | +    | W   |               | + |
| C7orf10           | chromosome 7 open reading frame 10                    |       |       |      | +   |       |       | +    |     | +             |   |
| C9orf100          | hypothetical protein FLJ14642                         |       |       |      | +   | W     | +     | +    |     |               |   |
| CA11              | carbonic anhydrase XI                                 |       |       |      |     |       |       | +    | +   |               | + |
| CAPZA1            | capping protein (actin filament) muscle Z-line        |       |       |      |     |       |       | +    |     |               |   |
| CARD15            | caspase recruitment domain family, member 15          |       |       |      |     |       |       | +    |     |               | + |
| CAT               | catalase                                              |       |       |      |     |       |       | +    |     |               | + |
| CCDC2             | capillary morphogenesis protein 1                     |       |       |      | +   |       |       |      |     |               |   |
| CCL1              | small inducible cytokine A1, I-309                    |       |       |      |     |       |       | +    | +   | +             | + |
| CCL3              | small inducible cytokine A3, Mip-1-alpha              |       |       |      | +   | +     | +     | +    | +   |               | + |
| CCL4              | small inducible cytokine A4, Mip-1-beta               |       |       |      | +   | +     | +     | +    | W   |               | + |
| CCL5              | small inducible cytokine A5 (RANTES)                  |       |       |      |     |       |       | W    | +   | +             | + |
| CCNL1             | cyclin L ania-6a                                      |       |       |      | +   | +     | +     | +    | +   | +             | + |
| CCR1              | chemokine (C-C motif) receptor 1                      |       |       |      |     |       |       | +    | W   |               |   |
| CCRL2             | chemokine (C-C motif) receptor-like 2                 |       |       |      | +   | +     | +     | +    | W   |               |   |
| CD37              | CD37 antigen                                          |       |       |      |     |       |       | W    |     |               | + |
| CD58              | CD58 antigen, (LFA 3)                                 |       |       |      |     |       |       | W    | +   |               | + |
| CD69              | CD69 antigen (p60, early T-cell activation antigen)   |       |       |      | W   | +     | +     | +    |     |               | + |
| CDCA1             | cell division cycle associated 1                      |       |       |      |     |       |       | +    | W   |               | W |
| CDH15             | cadherin 15, M-cadherin (myotubule)                   |       |       |      |     |       |       | +    |     | +             |   |
| CDKN1A            | cyclin-dependent kinase inhibitor 1A (p21, Cip1)      |       |       |      | +   |       |       |      |     |               | + |
| CHI3L2            | chitinase 3-like 2                                    |       |       |      |     |       |       | W    | +   |               | + |
| CLCN1             | chloride channel 1, skeletal muscle (Thomsen disease) |       |       |      |     |       |       | W    | +   |               |   |
| CLECSF14          | macrophage lectin 2 (calcium dependent)               |       |       |      |     |       |       | +    |     | W             |   |
| COX4I1            | cytochrome c oxidase subunit IV isoform 1             |       |       |      |     |       |       | +    |     |               | + |
| CREB1             | cAMP responsive element binding protein 1             |       |       |      | +   | +     | +     | +    |     | +             | + |
| CRYBA1            | crystallin, beta A1                                   |       |       |      |     |       |       | +    |     |               | + |
| CSF2              | colony stimulating factor 2 (granulocyte-macrophage)  |       |       |      |     |       |       | +    | +   | +             | + |
| CSF3              | colony stimulating factor 3 (granulocyte)             |       |       |      | +   |       |       | +    | W   |               | + |
| CST7              | cystatin F (leukocystatin)                            |       |       |      |     |       |       | +    | W   |               |   |
| CTSC              | cathepsin C                                           |       |       |      |     |       |       | +    |     |               | + |
| CYB5              | cytochrome b-5                                        |       |       |      |     |       |       | +    |     | W             |   |
| CYP51A1           | cytochrome P450, 51 (lanosterol 14-alpha-demethylase) |       |       |      | +   |       |       |      |     |               |   |
| DAF               | decay accelerating factor for complement              |       |       |      | +   | +     | +     | +    |     |               | + |
| DBI               | diazepam binding inhibitor (GABA receptor modulator)  |       |       |      | +   | +     | +     | +    |     |               | + |
| DBP               | D site of albumin promoter binding protein            |       |       |      |     |       |       |      |     |               | + |
| DDX21             | DEAD/H (Asp-Glu-Ala-Asp/His) box polypeptide 21       |       |       |      |     |       |       | +    |     |               |   |
| DDX31             | DEAD/H (Asp-Glu-Ala-Asp/His) box polypeptide 31       |       |       |      |     |       |       | +    |     |               |   |
| DDX47             | hqp0256 protein                                       |       |       |      | W   | +     | +     |      |     | +             |   |
| DGCR6L            | DiGeorge syndrome critical region gene 6 like         |       |       |      |     |       |       |      |     |               | + |
| DGUOK             | deoxyguanosine kinase                                 |       |       |      |     |       |       | +    |     |               |   |
| DJ434O14.3        | hypothetical protein dJ434O14.3                       |       |       |      |     |       |       | +    |     |               |   |
| DKFZp434K1210     | hypothetical protein DKFZp434K1210                    |       |       |      |     |       |       | +    | +   |               | + |
| DKFZp762L0311     | hypothetical protein DKFZp762L0311                    |       |       |      |     |       |       | +    | +   |               | + |



| EntrezGene<br>symbol | Description                                                  | + LPS |       |      |     | - LPS |     |       |      | Known targets |     |     |   |
|----------------------|--------------------------------------------------------------|-------|-------|------|-----|-------|-----|-------|------|---------------|-----|-----|---|
|                      |                                                              | p65   | c-Rel | RelB | p50 | p52   | p65 | c-Rel | RelB |               | p50 | p52 |   |
| KIAA0186             | KIAA0186 gene product                                        |       |       |      |     |       |     |       |      |               |     |     |   |
| KIAA0218             | KIAA0218 gene product                                        |       |       |      | +   | w     |     |       |      |               | +   |     |   |
| KIAA0319             | KIAA0319 gene product                                        |       |       |      | +   |       |     |       |      |               | w   |     |   |
| KIAA0409             | KIAA0409 protein                                             |       |       |      | +   |       |     |       |      |               | +   | +   |   |
| KIAA0669             | KIAA0669 gene product                                        |       |       |      | +   |       |     |       |      |               | w   |     |   |
| KIAA1008             | mitotic control protein dis3 homolog                         |       |       |      | +   |       |     |       |      |               | w   |     |   |
| KIAA1056             | KIAA1056 protein                                             |       |       |      | +   | +     |     |       |      |               |     |     |   |
| KLF15                | Kruppel-like factor 15                                       | +     |       |      |     |       |     |       |      |               |     |     |   |
| LGALS1               | lectin, galactoside-binding, soluble, 1 (galectin 1)         |       |       |      | +   |       |     |       |      |               | +   |     |   |
| LIM2                 | lens intrinsic membrane protein 2 (19kD)                     |       |       |      | +   |       |     |       |      |               |     |     |   |
| LIMK1                | LIM domain kinase 1                                          |       |       |      | +   |       |     |       |      |               | +   |     |   |
| LIPT1                | lipoyltransferase                                            |       |       |      | +   | +     | +   |       |      |               | +   | +   |   |
| LMNA                 | lamin A/C                                                    |       |       |      | w   | +     |     |       |      |               | +   |     |   |
| LOC113201            | hypothetical protein BC012124                                | +     |       |      |     |       |     |       |      |               |     |     |   |
| LOC116211            | hypothetical protein BC013113                                | +     | +     | w    |     |       |     |       |      |               |     |     |   |
| LOC51015             | CGI-111 protein                                              |       |       |      | +   |       |     |       |      |               | w   |     |   |
| LOC51321             | hypothetical protein                                         |       |       |      | w   | w     | +   |       |      |               | +   |     |   |
| LOC55580             | hypothetical protein                                         |       |       |      | +   |       |     |       |      |               |     |     |   |
| LOC92106             | hypothetical protein BC008322                                |       |       |      | +   |       |     |       |      |               | +   |     |   |
| LRRC19               | leucine rich repeat containing 19                            | +     | +     | +    |     |       |     |       |      |               | +   |     |   |
| LRSAM1               | leucine rich repeat and sterile alpha motif containing 1     | +     |       |      |     |       |     |       |      |               |     |     |   |
| M96                  | putative DNA binding protein                                 | +     |       |      |     |       |     |       |      |               |     |     |   |
| MAN2B1               | mannosidase, alpha, class 2B, member 1                       | +     | +     | +    | +   |       |     |       |      |               | w   |     |   |
| MAPK6                | mitogen-activated protein kinase 6                           | +     | +     |      |     |       |     |       |      |               |     |     |   |
| MASTL                | hypothetical protein FLJ14813                                |       |       |      | +   | +     | +   |       |      |               | +   | +   | + |
| MCC2                 | methylcrotonoyl-Coenzyme A carboxylase 2 (beta)              |       |       |      | +   |       |     |       |      |               | +   |     |   |
| MCP                  | membrane cofactor protein (CD46)                             | +     |       |      |     |       |     |       |      |               |     |     |   |
| MDH1                 | malate dehydrogenase 1, NAD (soluble)                        |       |       |      | w   | w     | +   |       |      |               | w   |     |   |
| MEF2B                | MADS box transcription factor 2, polypeptide B               | w     | +     | w    | w   |       |     |       |      |               |     |     |   |
| MGC10960             | hypothetical protein MGC10960                                | w     | +     |      |     |       |     |       |      |               |     |     |   |
| MGC10966             | hypothetical protein MGC10966                                |       |       |      | w   | +     | +   | +     |      |               |     |     |   |
| MGC14141             | hypothetical protein MGC14141                                |       |       |      | +   |       |     |       |      |               | +   |     |   |
| MGC4677              | hypothetical protein MGC4677                                 | +     | +     | w    | +   |       |     |       |      |               |     |     |   |
| MGC4771              | hypothetical protein MGC4771                                 |       |       |      | +   | +     | +   |       |      |               | +   | +   |   |
| MGC5242              | hypothetical protein MGC5242                                 |       |       |      | +   | +     |     |       |      |               | +   |     |   |
| MID1IP1              | hypothetical protein STRAIT11499                             | +     | +     | w    |     |       |     |       |      | w             | w   |     |   |
| MLLT10               | myeloid/lymphoid leukemia translocated to 10                 |       |       |      | +   |       |     |       |      |               |     |     |   |
| MMA8                 | hypothetical protein MGC20496                                |       |       |      | +   |       |     |       |      |               | +   |     |   |
| MMP19                | matrix metalloproteinase 19                                  |       |       |      | +   | +     | w   |       |      |               | +   |     |   |
| MMP8                 | matrix metalloproteinase 8 (neutrophil collagenase)          |       |       |      | +   |       |     |       |      |               |     |     |   |
| MMP9                 | matrix metalloproteinase 9 (gelatinase B, 92kD gelatinase)   | +     | +     | +    |     |       |     |       |      | +             | +   | X   |   |
| MRPL30               | mitochondrial ribosomal protein L30                          | +     | +     | +    |     |       |     |       |      | +             |     |     |   |
| MRPL34               | mitochondrial ribosomal protein L34                          |       |       |      | +   |       |     |       |      | +             |     |     |   |
| MRPS7                | mitochondrial ribosomal protein S7                           |       |       |      | +   | +     |     |       |      | +             |     |     |   |
| MX2                  | myxovirus (influenza virus) resistance 2 (mouse)             | +     |       |      |     |       |     |       |      |               |     |     |   |
| NAG73                | NPC-related protein NAG73                                    | +     | +     |      |     |       |     |       |      | +             |     |     |   |
| NAP1L1               | nucleosome assembly protein 1-like 1                         |       |       |      | +   |       |     |       |      |               |     |     |   |
| NAPA                 | N-ethylmaleimide-sensitive factor attachment protein, alpha  |       |       |      | +   |       |     |       |      | +             |     |     |   |
| NCR1                 | lymphocyte antigen 94 homolog, NK-p46, (mouse)               |       |       |      | +   |       |     |       |      |               |     |     |   |
| NFATC2               | nuclear factor of activated T-cells, calcineurin-dependent 2 |       |       |      | +   |       |     |       |      | +             |     |     |   |
| NFKB2                | NF-κB p52/p100                                               | +     | +     | +    | +   | +     |     |       |      | +             | +   | +   | X |
| NFKB1B               | NF-κB inhibitor, beta                                        | +     | w     | +    | +   |       |     |       |      | w             | +   |     |   |
| NKG7                 | natural killer cell group 7 sequence                         |       |       |      | +   | w     |     |       |      |               |     |     |   |
| NME1                 | non-metastatic cells 1, protein (NM23A) expressed in         |       |       |      | +   |       |     |       |      |               |     |     |   |
| NOLC1                | nucleolar and coiled-body phosphoprotein 1                   |       |       |      | +   | w     |     |       |      |               |     |     |   |
| NOVA1                | neuro-oncological ventral antigen 1                          |       |       |      |     |       |     |       | +    | +             |     |     |   |
| NR1D1                | nuclear receptor subfamily 1, group D, member 1              |       |       |      | w   | +     |     |       |      | +             |     |     |   |
| NRAS                 | neuroblastoma RAS viral (v-ras) oncogene homolog             |       |       |      | w   | +     |     |       |      |               |     |     |   |
| NRXN3                | neurexin 3                                                   |       |       |      | +   |       |     |       |      |               |     |     |   |
| NUP107               | nuclear pore complex protein                                 |       |       |      |     |       | +   | w     |      |               | +   |     |   |
| OAS3                 | 2'-5'-oligoadenylate synthetase 3 (100 kD)                   | +     | +     | +    | +   |       |     |       |      | +             |     | X   |   |
| OAZ1                 | ornithine decarboxylase antizyme 1                           |       |       |      | +   |       |     |       |      | +             |     |     |   |
| OAZ2                 | ornithine decarboxylase antizyme 2                           |       |       |      | +   |       |     |       |      |               |     |     |   |
| ORMDL1               | hypothetical protein                                         |       |       |      |     |       |     |       |      | +             |     |     |   |
| P4HA1                | procollagen-proline, 2-oxoglutarate 4-dioxygenase alpha      | +     | w     | +    | +   | +     |     |       |      | +             | +   | +   |   |
| PAFAH2               | platelet-activating factor acetylhydrolase 2 (40kD)          |       |       |      | w   | +     |     |       |      | w             |     |     |   |
| PAK4                 | p21(CDKN1A)-activated kinase 4                               |       |       |      | w   | +     |     |       |      | +             |     |     |   |
| PALM                 | paralemmin                                                   |       |       |      | +   |       |     |       |      | +             |     |     |   |
| PDE6D                | phosphodiesterase 6D, cGMP-specific, rod, delta              |       |       |      | +   | w     |     |       |      | +             |     |     |   |
| PEX13                | peroxisome biogenesis factor 13                              | +     |       |      | w   | +     |     |       |      |               |     |     |   |
| PHLDA1               | pleckstrin homology-like domain, family A, member 1          |       |       |      | +   | w     |     |       |      |               |     |     |   |
| PILRA                | paired immunoglobulin-like receptor alpha                    | +     | +     | w    |     |       |     |       |      |               |     |     |   |
| PILRB                | paired immunoglobulin-like receptor beta                     | w     | +     | w    |     |       |     |       |      | w             |     |     |   |
| PKM2                 | pyruvate kinase, muscle                                      | +     |       |      | w   |       |     |       |      | +             |     |     |   |
| PLK1                 | polo-like kinase (Drosophila)                                |       |       |      | +   |       |     |       |      | +             |     |     |   |
| PLXNB1               | plexin B1                                                    | +     |       |      |     |       |     |       | +    |               |     |     |   |
| PMAIP1               | phorbol-12-myristate-13-acetate-induced protein 1            |       |       |      | +   | +     | +   |       |      | +             |     |     |   |
| PMS1                 | PMS1 postmeiotic segregation increased 1 (S. cerevisiae)     |       |       |      | +   |       |     |       |      |               |     |     |   |
| PMS2L8               | postmeiotic segregation increased 2-like 8                   |       |       |      | +   |       |     |       |      |               |     |     |   |



| EntrezGene symbol | Description                                              | + LPS |       |      |     | - LPS |       |      |     | Known targets |
|-------------------|----------------------------------------------------------|-------|-------|------|-----|-------|-------|------|-----|---------------|
|                   |                                                          | p65   | c-Rel | RelB | p50 | p65   | c-Rel | RelB | p50 |               |
| TFE3              | transcription factor binding to IGHM enhancer 3          |       |       | +    |     |       |       |      |     |               |
| TIMP1             | tissue inhibitor of metalloproteinase 1                  | +     | +     | +    | +   |       |       |      |     |               |
| TJP2              | tight junction protein 2 (zona occludens 2)              |       |       | +    | +   |       |       |      |     |               |
| TLN1              | talín 1                                                  |       |       | +    | +   |       |       |      | +   |               |
| TMPIT             | transmembrane protein induced by tumor TNF               |       |       |      | +   | +     |       |      | +   | +             |
| TNF               | tumor necrosis factor (TNF superfamily, member 2)        | +     | +     | +    | w   | +     |       |      |     | X             |
| TNFRSF1A          | tumor necrosis factor receptor superfamily, member 1A    | +     | +     | w    | w   |       |       |      |     |               |
| TNFSF13           | tumor necrosis factor (ligand) superfamily, member 13    |       |       |      | +   | +     |       |      | +   | +             |
| TNFSF13B          | tumor necrosis factor (ligand) superfamily, member 13b   |       |       |      | +   | w     |       |      |     |               |
| TNFSF14           | tumor necrosis factor (ligand) superfamily, member 14    |       |       | +    | w   |       |       |      |     |               |
| TNIP3             | hypothetical protein FLJ21162                            | +     |       |      |     |       |       |      |     |               |
| TRA1              | tumor rejection antigen (gp96) 1                         |       |       |      | +   | w     |       |      |     |               |
| TRAF1             | TNF receptor-associated factor 1                         | +     | +     | +    | +   |       |       |      | +   | X             |
| TRAPPC3           | similar to yeast BET3 (S. cerevisiae)                    |       |       | +    | +   |       |       |      | +   | +             |
| TRIM31            | tripartite motif-containing 31                           |       |       | +    | +   |       |       |      |     |               |
| TRPM2             | transient receptor potential cation channel, subfamily M |       |       | +    | +   |       |       | +    |     |               |
| TTC17             | hypothetical protein FLJ10890                            |       |       |      |     | +     | +     |      | +   |               |
| UBE2H             | ubiquitin-conjugating enzyme E2H                         |       |       | +    | w   |       |       |      |     |               |
| UBE2L6            | ubiquitin-conjugating enzyme E2L 6                       |       |       |      | +   |       |       |      | +   | +             |
| USP2              | ubiquitin specific protease 2                            |       |       |      | +   |       |       |      |     |               |
| USP25             | ubiquitin specific protease 25                           |       |       | +    |     |       |       |      |     |               |
| USP52             | KIAA0710 gene product                                    | +     |       | +    | w   |       |       |      |     |               |
| VAV1              | vav 1 oncogene                                           | +     | w     | +    | +   | w     |       |      |     |               |
| VSIG4             | Ig superfamily protein                                   | +     |       | +    | w   |       |       |      |     |               |
| WBP4              | WW domain binding protein 4 (formin binding protein 21)  | +     | +     | +    | +   |       |       |      | +   |               |
| YME1L1            | YME1-like 1 (S. cerevisiae)                              |       |       |      |     |       |       |      | +   |               |
| YWHAB             | tyrosine 3-monooxygenase, beta polypeptide               |       |       |      | +   |       |       |      | +   |               |
| ZBTB11            | zinc finger protein                                      |       |       |      | +   |       |       |      | +   |               |
| ZDHHC6            | hypothetical protein FLJ21952                            | +     |       | w    | w   |       |       |      |     |               |
| ZNF217            | zinc finger protein 217                                  |       |       | +    |     |       |       |      |     |               |
| ZNF221            | zinc finger protein 221                                  |       |       | +    | +   | +     |       |      | +   | +             |
| ZNF581            | HSPC189 protein                                          |       |       | +    |     |       |       |      |     |               |
| ZNF76             | zinc finger protein 76 (expressed in testis)             | +     | +     | w    |     |       |       |      |     |               |
| ZNHIT1            | putative cyclin G1 interacting protein                   |       |       | +    |     |       |       |      |     |               |

+, Indicates high confidence binding ( $p < 0.002$ ),  
at least one subunit had to match this criterion  
w, Indicates weaker binding events ( $p < 0.01$ )
