# Supplementary material
Source: PubMed Central journal article supplement (PMC1458670)
Supplement: pnas_0510996103_9.pdf [file pnas_0510996103_9.pdf]

**Table 4. Genes bound by E2F4 in unstimulated U937 cells**

| EntrezGene symbol | Description                                             | EntrezGene symbol | Description                                           |
|-------------------|---------------------------------------------------------|-------------------|-------------------------------------------------------|
| AK2               | adenylate kinase 2                                      | ITGA2             | integrin, alpha 2 (CD49B)                             |
| AP2S1             | adaptor-related protein complex 2, sigma 1 subunit      | KIAA0042          | KIAA0042 gene product                                 |
| AP4B1             | adaptor-related protein complex 4, beta 1 subunit       | KIAA0092          | KIAA0092 gene product                                 |
| APG4C             | APG4 autophagy 4 homolog C (S. cerevisiae)              | KIAA0101          | KIAA0101 gene product                                 |
| ARHGAP11A         | KIAA0013 gene product                                   | KIAA0410          | KIAA0410 gene product                                 |
| ASF1B             | ASF1 anti-silencing function 1 homolog B                | KIAA0747          | KIAA0747 protein                                      |
| ATF2              | activating transcription factor 2                       | KIAA0872          | KIAA0872 protein                                      |
| ATM               | ataxia telangiectasia mutated                           | KIF20A            | kinesin family member 20A                             |
| ATP5G3            | ATP synthase, H+ transporting, mitochondrial F0 complex | KIF22             | kinesin family member 22                              |
| BAT4              | HLA-B associated transcript 4                           | KIF2C             | kinesin family member 2C                              |
| BAZ1B             | bromodomain adjacent to zinc finger domain, 1B          | KIF4A             | kinesin family member 4A                              |
| BCAS1             | breast carcinoma amplified sequence 1                   | KNSL7             | kinesin-like 7                                        |
| BLM               | Bloom syndrome                                          | KNTC2             | kinetochore associated 2                              |
| BRD8              | bromodomain containing 8                                | KPNB1             | karyopherin (importin) beta 1                         |
| BUB3              | BUB3 budding uninhibited by benzimidazoles 3 homolog    | LENG5             | leukocyte receptor cluster (LRC) member 5             |
| C10orf7           | chromosome 10 open reading frame 76                     | LGALS1            | lectin, galactoside-binding, soluble, 1               |
| C11orf10          | chromosome 11 open reading frame 10                     | LOC55924          | hypothetical protein                                  |
| C12orf5           | chromosome 12 open reading frame 5                      | LOC81691          | exonuclease NEF-sp                                    |
| C14orf123         | chromosome 14 open reading frame 123                    | LSM4              | U6 snRNA-associated Sm-like protein                   |
| C20orf172         | chromosome 20 open reading frame 172                    | LUC7L2            | LUC7-like 2 (S. cerevisiae)                           |
| C20orf77          | chromosome 20 open reading frame 77                     | M96               | putative DNA binding protein                          |
| C21orf45          | chromosome 21 open reading frame 45                     | MAPK7             | mitogen-activated protein kinase 7                    |
| C6orf166          | chromosome 6 open reading frame 166                     | MASTL             | microtubule associated serine/threonine kinase-like   |
| C6orf18           | chromosome 6 open reading frame 18                      | MCM3              | MCM3 minichromosome maintenance deficient 3           |
| C6orf211          | chromosome 6 open reading frame 211                     | MDH1              | malate dehydrogenase 1, NAD (soluble)                 |
| C6orf82           | chromosome 6 open reading frame 82                      | MDS009            | x 009 protein                                         |
| C9orf76           | chromosome 9 open reading frame 76                      | MGC5469           | hypothetical protein MGC5469                          |
| CASP2             | caspase 2, apoptosis-related cysteine protease          | MIS12             | MIS12 homolog (yeast)                                 |
| CASP8AP2          | CASP8 associated protein 2                              | MRP63             | mitochondrial ribosomal protein 63                    |
| CBX3              | chromobox homolog 3 (HP1 gamma homolog, Drosophila)     | MRPS11            | mitochondrial ribosomal protein S11                   |
| CBX5              | chromobox homolog 5 (HP1 alpha homolog, Drosophila)     | MRPS15            | mitochondrial ribosomal protein S15                   |
| CCNB1             | cyclin B1                                               | MRPS18C           | mitochondrial ribosomal protein S18C                  |
| CDC25A            | cell division cycle 25A                                 | MRPS27            | mitochondrial ribosomal protein S27                   |
| CDC25C            | cell division cycle 25C                                 | MTAP              | methylthioadenosine phosphorylase                     |
| CDC6              | CDC6 cell division cycle 6 homolog (S. cerevisiae)      | MTRF1L            | mitochondrial translational release factor 1-like     |
| CDCA1             | cell division cycle associated 1                        | MUT               | methylmalonyl Coenzyme A mutase                       |
| CDCA8             | cell division cycle associated 8                        | MYOHD1            | myosin head domain containing 1                       |
| CENPF             | centromere protein F (350/400kD, mitotin)               | NAP1L1            | nucleosome assembly protein 1-like 1                  |
| CKAP1             | cytoskeleton-associated protein 1                       | NBR2              | NBR2                                                  |
| CLSPN             | claspin homolog (Xenopus laevis)                        | NDUFA1            | NADH dehydrogenase 1 alpha subcomplex, 1              |
| CSTF3             | cleavage stimulation factor, 3' pre-RNA, subunit 3      | NDUFB9            | NADH dehydrogenase 1 beta subcomplex, 9               |
| DCLRE1B           | DNA cross-link repair 1B (PSO2 homolog, S. cerevisiae)  | NEK2              | NIMA (never in mitosis gene a)-related kinase 2       |
| DDX10             | DEAD/H (Asp-Glu-Ala-Asp/His) box polypeptide 10         | NFKBIB            | NF-κB inhibitor, beta                                 |
| DKFZP434B168      | DKFZP434B168 protein                                    | NFYA              | nuclear transcription factor Y, alpha                 |
| DLG7              | discs, large homolog 7 (Drosophila)                     | NFYC              | nuclear transcription factor Y, gamma                 |
| EIF3S2            | eukaryotic translation initiation factor 3, subunit 2   | NUDT15            | nudix-type motif 15                                   |
| EXO1              | exonuclease 1                                           | NUP98             | nucleoporin 98kD                                      |
| FANCL             | Fanconi anemia, complementation group L                 | NUSAP1            | nucleolar and spindle associated protein 1            |
| FLJ10579          | hypothetical protein FLJ10579                           | ORC3L             | origin recognition complex, subunit 3-like            |
| FLJ10922          | hypothetical protein FLJ10922                           | ORMDL1            | ORM1-like 1 (S. cerevisiae)                           |
| FLJ11029          | hypothetical protein FLJ11029                           | PAI-RBP1          | PAI-1 mRNA-binding protein                            |
| FLJ11222          | hypothetical protein FLJ11222                           | PCNA              | proliferating cell nuclear antigen                    |
| FLJ13912          | hypothetical protein FLJ13912                           | PCNP              | PEST-containing nuclear protein                       |
| FLJ20354          | hypothetical protein FLJ20354                           | PDZK11            | PDZ domain containing 11                              |
| FLJ20508          | hypothetical protein FLJ20508                           | PELO              | pelota homolog (Drosophila)                           |
| GHITM             | growth hormone inducible transmembrane protein          | PEX12             | peroxisomal biogenesis factor 12                      |
| GPHN              | gephyrin                                                | PIGC              | phosphatidylinositol glycan, class C                  |
| H2AFG             | H2A histone family, member G                            | PLCG2             | phospholipase C, gamma 2                              |
| H2AFP             | H2A histone family, member P                            | PLK1              | Polo like Kinase 1                                    |
| HAGHL             | hydroxyacylglutathione hydrolase-like                   | PLK4              | Polo like Kinase 4                                    |
| HIST1H2AJ         | histone 1, H2aj                                         | PMS1              | PMS1 postmeiotic segregation increased 1              |
| HIST1H2AL         | histone 1, H2al                                         | POLA              | polymerase (DNA directed), alpha                      |
| HIST1H2BJ         | histone 1, H2bj                                         | POLD1             | polymerase (DNA directed), delta 1, catalytic subunit |
| HIST1H2BK         | histone 1, H2bk                                         | POLE3             | polymerase (DNA directed), epsilon 3 (p17 subunit)    |
| HIST1H2BL         | histone 1, H2bl                                         | POLR3K            | polymerase (RNA) III (DNA directed) polypeptide K     |
| HIST1H2BM         | histone 1, H2bm                                         | PRPS1             | phosphoribosyl pyrophosphate synthetase 1             |
| HIST1H3B          | histone 1, H3b                                          | QPCTL             | glutamyl-peptide cyclotransferase-like                |
| HIST1H4C          | histone 1, H4c                                          | RAD51             | RAD51 homolog (RecA homolog, E. coli)                 |
| HIST1H4K          | histone 1, H4k                                          | RAMP              | RA-regulated nuclear matrix-associated protein        |
| HMGB2             | high-mobility group box 2                               | RBBP4             | retinoblastoma binding protein 4                      |
| HNRPA1            | heterogeneous nuclear ribonucleoprotein A1              | RBL1              | retinoblastoma-like 1 (p107)                          |
| HPCL2             | 2-hydroxyphytanoyl-CoA lyase                            | RBM15             | RNA binding motif protein 15                          |
| HSPC052           | HSPC052 protein                                         | RFC5              | replication factor C (activator 1) 5 (36.5kD)         |
| HSPC150           | HSPC150 protein similar to ubiquitin-conjugating enzyme | RNASE4            | ribonuclease, RNase A family, 4                       |
| HT007             | uncharacterized hypothalamus protein HT007              | RNPC2             | RNA-binding region (RNP1, RRM) containing 2           |
| IER5              | immediate early response 5                              | RPGR              | retinitis pigmentosa GTPase regulator                 |
| IRF3              | interferon regulatory factor 3                          | RPL26             | ribosomal protein L26                                 |

## EntrezGene Description

### symbol

|           |                                                                        |
|-----------|------------------------------------------------------------------------|
| RPL37     | ribosomal protein L37                                                  |
| RPL39L    | ribosomal protein L39-like                                             |
| RQCD1     | RCD1 required for cell differentiation1 homolog                        |
| RRM1      | ribonucleotide reductase M1 polypeptide                                |
| RXRβ      | retinoid X receptor, beta                                              |
| SAMHD1    | SAM domain and HD domain, 1                                            |
| SF3A3     | splicing factor 3a, subunit 3, 60kD                                    |
| SFRS1     | splicing factor, arginine/serine-rich 1                                |
| SFRS2     | splicing factor, arginine/serine-rich 2                                |
| SLC2A4    | solute carrier family 2, member 4                                      |
| SLC31A1   | solute carrier family 31, member 1                                     |
| SLC35A5   | solute carrier family 35, member A5                                    |
| SLC39A9   | solute carrier family 39, member 9                                     |
| SLC8A3    | solute carrier family 8, member 3                                      |
| SMC1L1    | SMC1 structural maintenance of chromosomes 1-like 1                    |
| SMC2L1    | SMC2 structural maintenance of chromosomes 2-like 1                    |
| SMC4L1    | SMC4 structural maintenance of chromosomes 4-like 1                    |
| SMN2      | survival of motor neuron 2, centromeric                                |
| SNRPD2    | small nuclear ribonucleoprotein D2 polypeptide (16.5kD)                |
| SNX13     | sorting nexin 13                                                       |
| SPOCK3    | sparc, cwcv and kazal-like domains proteoglycan 3                      |
| STOML2    | stomatolysin (EPB72)-like 2                                            |
| SUCLG1    | succinate-CoA ligase, GDP-forming, alpha subunit                       |
| SULT1A3   | sulfotransferase family, cytosolic, 1A, phenol-preferring 3            |
| SUMO1     | SMT3 suppressor of mif two 3 homolog 1                                 |
| TCF19     | transcription factor 19 (SC1)                                          |
| TDRD3     | tudor domain containing 3                                              |
| TIMELESS  | timeless homolog (Drosophila)                                          |
| TMEM5     | transmembrane protein 5                                                |
| TOPK      | T-LAK cell-originated protein kinase                                   |
| TTF2      | transcription termination factor, RNA polymerase II                    |
| TTRAP     | TRAF and TNF receptor associated protein                               |
| TU12B1-TY | TU12B1-TY protein                                                      |
| TUSC4     | tumor suppressor candidate 4                                           |
| TYMS      | thymidylate synthetase                                                 |
| UCHL5     | ubiquitin carboxyl-terminal hydrolase L5                               |
| USP1      | ubiquitin specific protease 1                                          |
| VILL      | villin-like                                                            |
| VPS29     | vacuolar protein sorting 29 (yeast)                                    |
| WDR19     | WD repeat domain 19                                                    |
| XRCC5     | X-ray repair complementing defective repair in Chinese hamster cells 5 |
| YWHAB     | tyrosine 3-monooxygenase/tryptophan 5-monooxygenase activation protein |
| ZIC1      | Zic family member 1 (odd-paired homolog, Drosophila)                   |
| ZNF451    | zinc finger protein 451                                                |
