# Supplementary material
Source: PubMed Central journal article supplement (PMC1458670)
Supplement: pnas_0510996103_10.pdf [file pnas_0510996103_10.pdf]

**Table 5. Genes bound by four or five NF- $\kappa$ B subunits****EntrezGene Description  
symbol****4 subunits**

|          |                                                                                                  |
|----------|--------------------------------------------------------------------------------------------------|
| APBB1IP  | similar to proline-rich protein 48                                                               |
| ASH1     | hypothetical protein ASH1                                                                        |
| BCL2A1   | BCL2-related protein A1                                                                          |
| C3       | complement component 3                                                                           |
| CCL4     | small inducible cytokine A4                                                                      |
| CCR2     | chemokine (C-C motif) receptor-like 2                                                            |
| CD69     | CD69 antigen (p60, early T-cell activation antigen)                                              |
| CREB1    | cAMP responsive element binding protein 1                                                        |
| DBI      | diazepam binding inhibitor (GABA receptor modulator, acyl-Coenzyme A binding protein)            |
| EMP3     | epithelial membrane protein 3                                                                    |
| FLJ10420 | hypothetical protein FLJ10420                                                                    |
| FLJ22555 | hypothetical protein FLJ22555                                                                    |
| HSPCB    | heat shock 90kD protein 1, beta                                                                  |
| IL1F9    | interleukin-1 homolog 1                                                                          |
| MAN2B1   | mannosidase, alpha, class 2B, member 1                                                           |
| OAS3     | 2'-5'-oligoadenylate synthetase 3 (100 kD)                                                       |
| P4HA1    | procollagen-proline, 2-oxoglutarate 4-dioxygenase (proline 4-hydroxylase), alpha polypeptide I   |
| PPP1R15B | protein phosphatase 1, regulatory (inhibitor) subunit 15B                                        |
| TAPBP    | TAP binding protein (tapasin)                                                                    |
| TIMP1    | tissue inhibitor of metalloproteinase 1 (erythroid potentiating activity, collagenase inhibitor) |
| TNF      | tumor necrosis factor (TNF superfamily, member 2)                                                |
| WBP4     | WW domain binding protein 4 (formin binding protein 21)                                          |

**5 subunits**

|          |                                                    |
|----------|----------------------------------------------------|
| AQP9     | aquaporin 9                                        |
| ARHGEF2  | rho/rac guanine nucleotide exchange factor (GEF) 2 |
| CCL3     | small inducible cytokine A3, Mip-1-alpha           |
| CCNL1    | cyclin L ania-6a                                   |
| DAF      | decay accelerating factor for complement (CD55)    |
| FLJ20477 | hypothetical protein FLJ20477                      |
| FLOT1    | flotillin 1                                        |
| GADD45B  | growth arrest and DNA-damage-inducible, beta       |
| GPX1     | glutathione peroxidase 1                           |
| GYPC     | glycophorin C (Gerbich blood group)                |
| ICAM1    | intercellular adhesion molecule 1 (CD54)           |
| IL2RG    | interleukin 2 receptor, gamma                      |
| NFKB2    | p52/p100                                           |
| SMPD1    | sphingomyelin phosphodiesterase 1, acid lysosomal  |
| TRAF1    | TNF receptor-associated factor 1                   |
