# Supplementary material
Source: PubMed Central journal article supplement (PMC1458670)

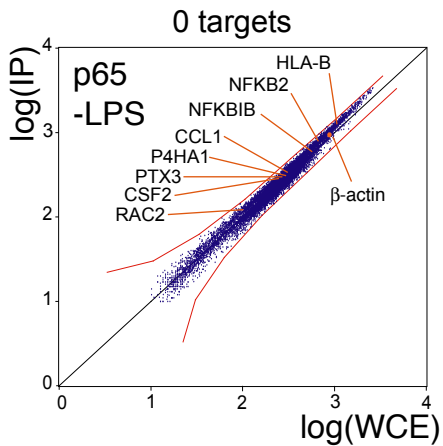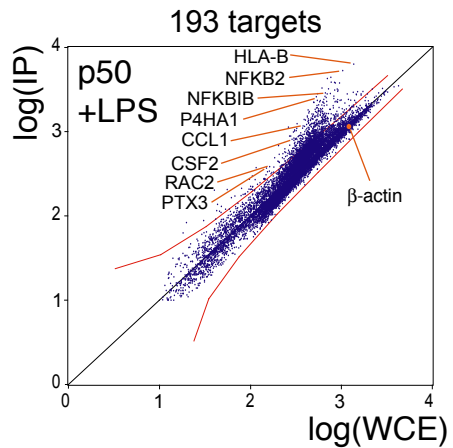

Supplement: pnas_0510996103_1.pdf [file pnas_0510996103_1.pdf]

**A**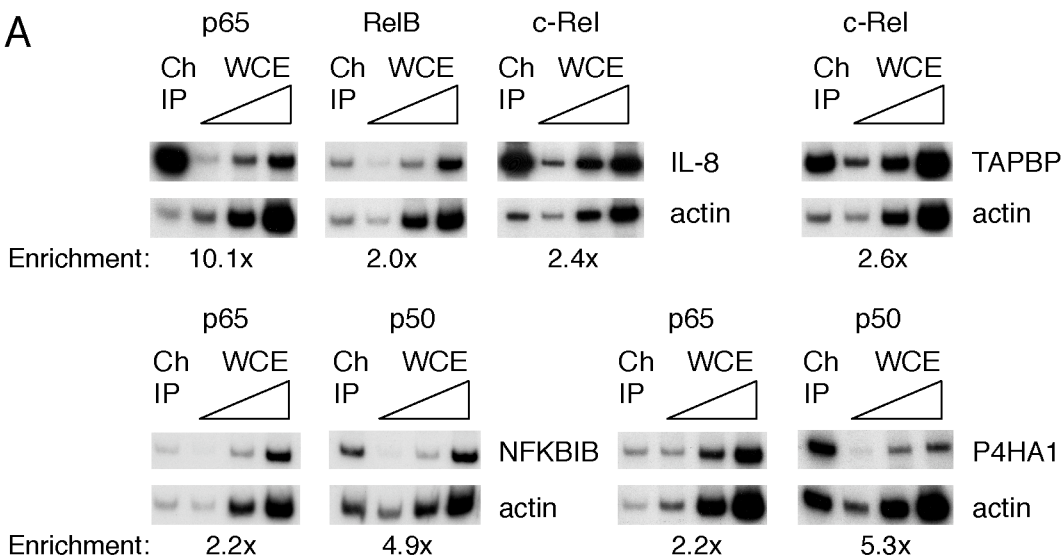**B**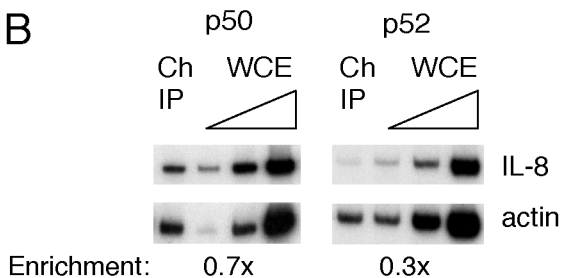**C**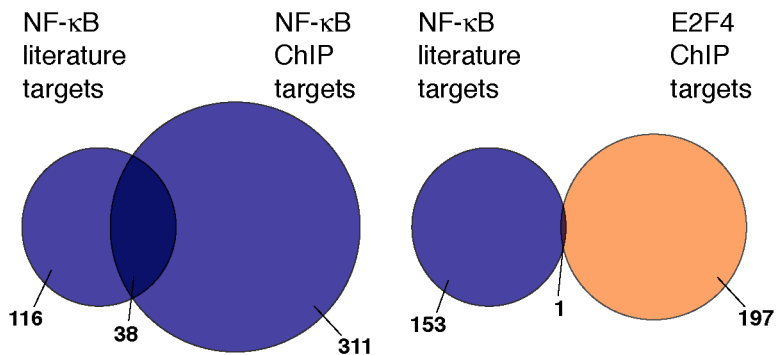

Supplement: pnas_0510996103_2.pdf [file pnas_0510996103_2.pdf]

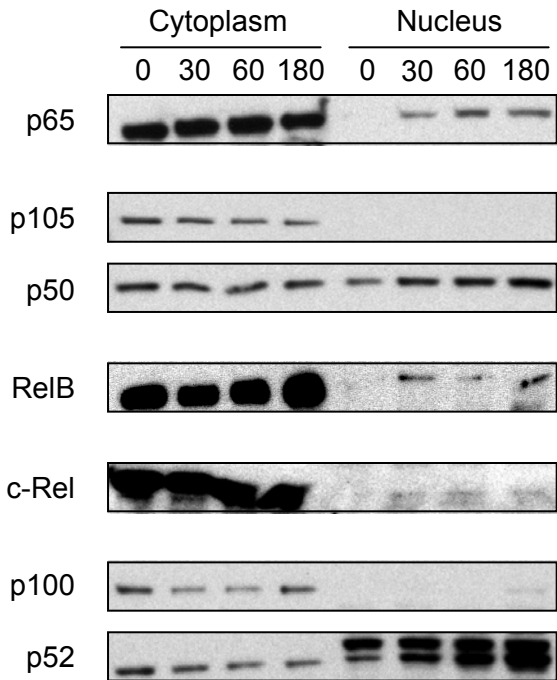

Supplement: pnas_0510996103_3.pdf [file pnas_0510996103_3.pdf]

**A**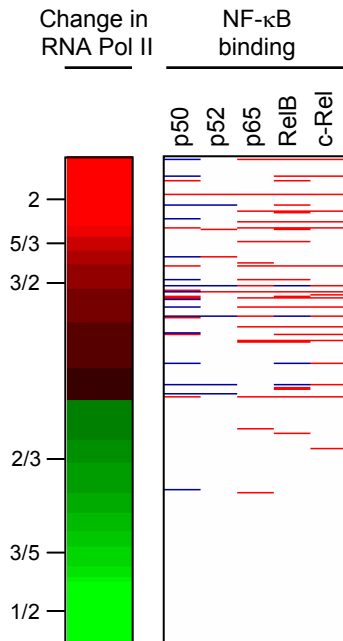**B**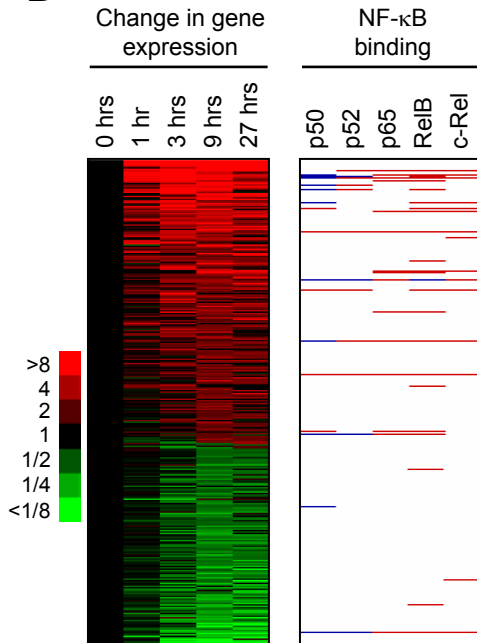

Supplement: pnas_0510996103_4.pdf [file pnas_0510996103_4.pdf]

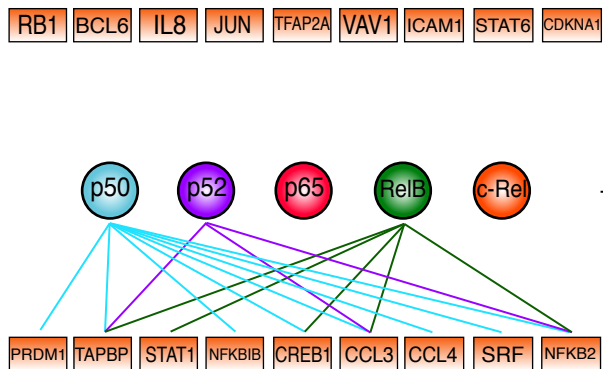

+ LPS  
→

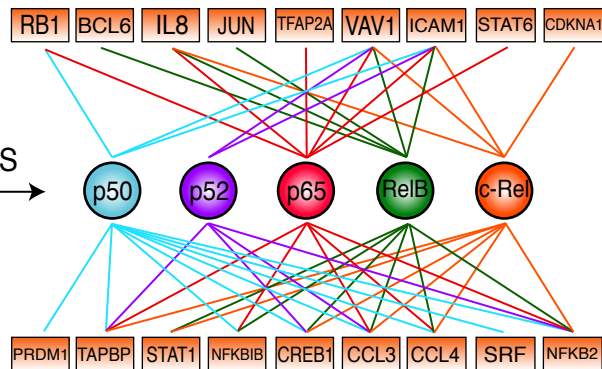

Supplement: pnas_0510996103_5.pdf [file pnas_0510996103_5.pdf]
